# Supplementary material
Source: Springer Nature journal article supplement (https://www.springermedizin.de/resource/supplementary/12939_2012_381_MOESM5_ESM.pdf/9551016)

# Correlates of Impoverishment

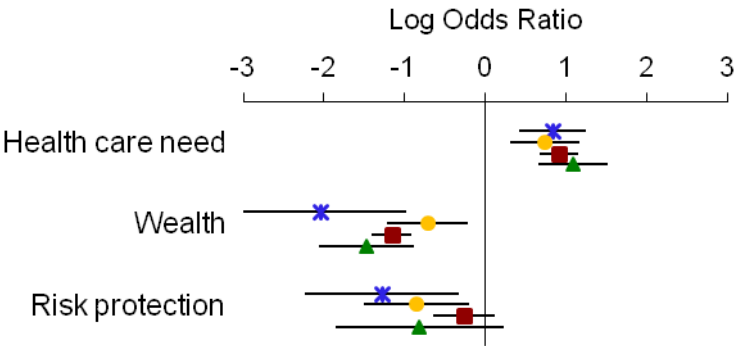

✖ China (n=2876)

● Malaysia (n=4167)

Supplement: MOESM5 [file 9551016]
